# Supplementary material
Source: PubMed Central journal article supplement (PMC1187938)

## **A Munc13/RIM/Rab3 Tripartite Complex: From Priming to Plasticity?**

Irina Dulubova<sup>1</sup>, Xuelin Lou<sup>2</sup>, Jun Lu<sup>1</sup>, Iryna Huryeva<sup>1</sup>, Amer Alam<sup>1</sup>, Ralf Schneggenburger<sup>2</sup>,  
Thomas C. Südhof<sup>3</sup> and Josep Rizo<sup>1,4</sup>

<sup>1</sup>*Departments of Biochemistry and Pharmacology, <sup>3</sup>Center for Basic Neuroscience, Department of Molecular Genetics, and Howard Hughes Medical Institute, University of Texas Southwestern Medical Center, 5323 Harry Hines Blvd., Dallas, Texas 75390, USA*

<sup>2</sup>*Max Planck Institute for Biophysical Chemistry, AG Synaptic Dynamics & Modulation and Dept. of Membrane Biophysics, Am Fassberg 11, 37077 Germany*

<sup>4</sup> Corresponding author. E-mail: [jose@arnie.swmed.edu](mailto:jose@arnie.swmed.edu). Phone: 214-645-6360. FAX: 214-645-6353

**Supplementary Fig. 2.** Mutations in the RIM2 $\alpha$  ZF domain do not perturb the overall structure of the domain. (A) <sup>1</sup>H-<sup>15</sup>N HSQC spectra of the wild type RIM2 $\alpha$  ZF domain (residues 82-142). (B-F) Superpositions of <sup>1</sup>H-<sup>15</sup>N HSQC spectrum of the wild type RIM2 $\alpha$  ZF domain (in black) with <sup>1</sup>H-<sup>15</sup>N HSQC spectra of the: (B) K<sub>97</sub>E mutant (in red), (C) K<sub>97</sub>E / K<sub>99</sub>E double-point mutant (in green), (D) D<sub>102</sub>K mutant (in yellow), (E) R<sub>126</sub>E mutant (in red), and (F) K<sub>129</sub>D mutant RIM2 $\alpha$  ZF domain (in yellow).

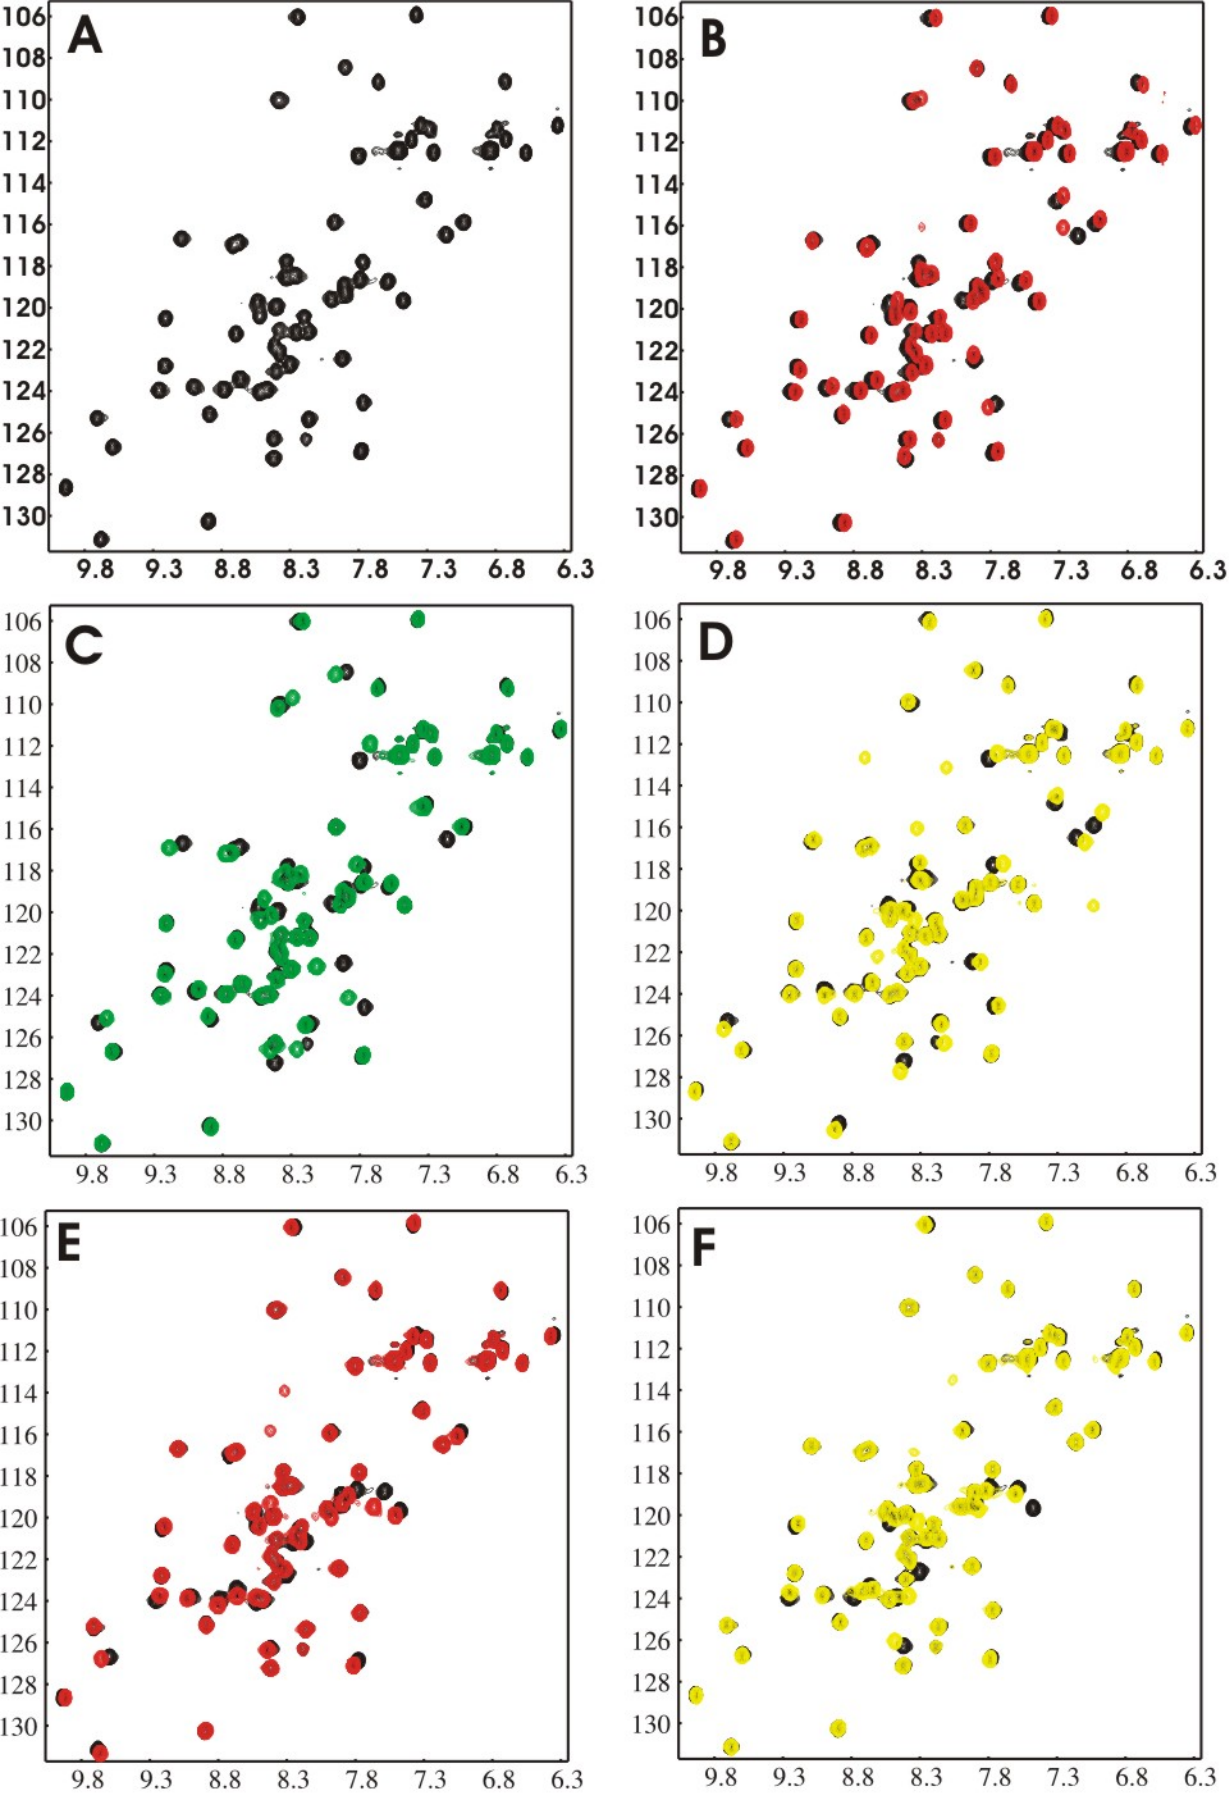

Supplement: 7600753s2.pdf [file 7600753s2.pdf]
