# Supplementary material
Source: PubMed Central journal article supplement (PMC1187938)

## **A Munc13/RIM/Rab3 Tripartite Complex: From Priming to Plasticity?**

Irina Dulubova<sup>1</sup>, Xuelin Lou<sup>2</sup>, Jun Lu<sup>1</sup>, Iryna Huryeva<sup>1</sup>, Amer Alam<sup>1</sup>, Ralf Schneggenburger<sup>2</sup>,

Thomas C. Südhof<sup>3</sup> and Josep Rizo<sup>1,4</sup>

<sup>1</sup>*Departments of Biochemistry and Pharmacology, <sup>3</sup>Center for Basic Neuroscience, Department of Molecular Genetics, and Howard Hughes Medical Institute, University of Texas Southwestern Medical Center, 5323 Harry Hines Blvd., Dallas, Texas 75390, USA*

<sup>2</sup>*Max Planck Institute for Biophysical Chemistry, AG Synaptic Dynamics & Modulation and Dept. of Membrane Biophysics, Am Fassberg 11, 37077 Germany*

<sup>4</sup> Corresponding author. E-mail: [jose@arnie.swmed.edu](mailto:jose@arnie.swmed.edu). Phone: 214-645-6360. FAX: 214-645-6353

**Supplementary Fig. 3.** The D<sub>102</sub>K, R<sub>126</sub>E and K<sub>129</sub>D point mutation in the RIM2 $\alpha$  ZF domain do not abolish Munc13-1 binding. **(A-C)** Amide region of 1D <sup>15</sup>N-edited <sup>1</sup>H-NMR spectra of <sup>1</sup>H-<sup>15</sup>N-labeled D<sub>102</sub>K **(A)**, R<sub>126</sub>E **(B)** and K<sub>129</sub>D **(C)** RIM2 $\alpha$ <sub>82-142</sub> (7.5  $\mu$ M) in the absence (left panels) or presence (right panels) of unlabeled Munc13-1<sub>3-209</sub> fragment (20  $\mu$ M). **(D)** Superdex S75 (16/60) elution profiles of the Munc13-1<sub>3-209</sub> fragment together with an equimolar amount of WT (red), D<sub>102</sub>K (yellow), R<sub>126</sub>E (black) or K<sub>129</sub>D (blue) RIM2 $\alpha$ <sub>82-142</sub>.

- Munc13-1(3-209)

+ Munc13-1(3-209)

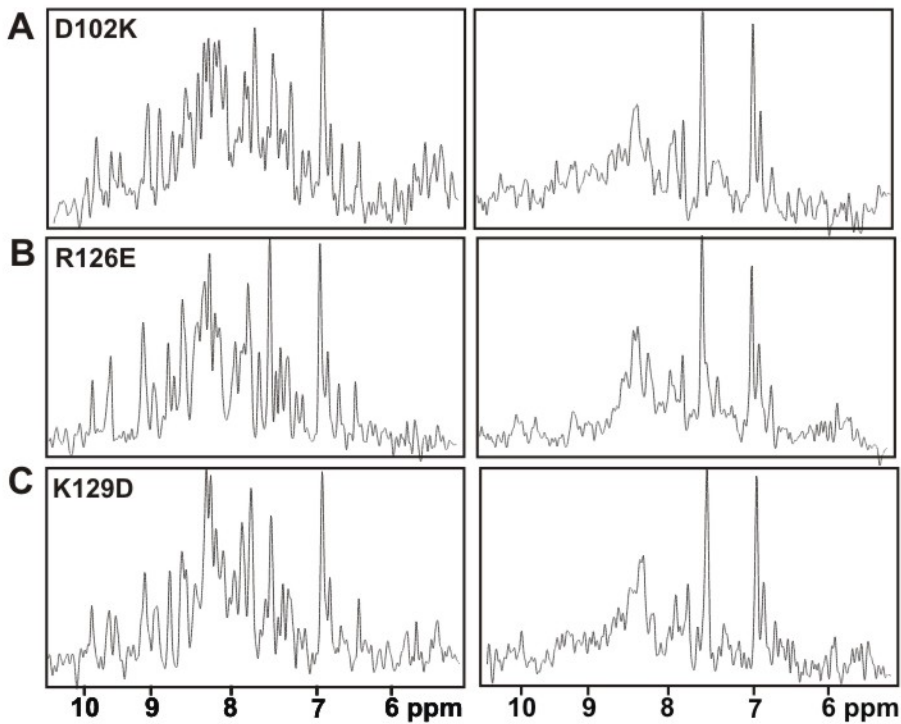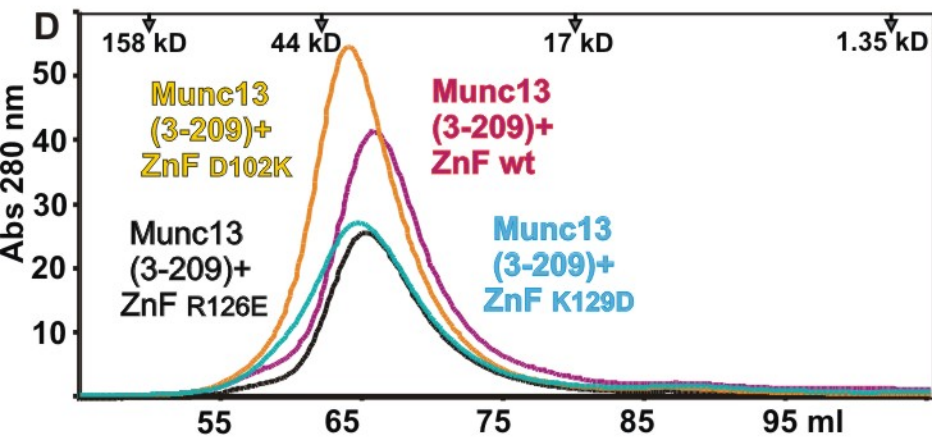

Supplement: 7600753s3.pdf [file 7600753s3.pdf]
